# Supplementary material for: Lipids associated with plant-bacteria interaction identified using a metabolomics approach in an Arabidopsis thaliana model
Source: PeerJ. 2022 Apr 27;10:e13293. doi: 10.7717/peerj.13293 (PMC9055996; doi:10.7717/peerj.13293)
Supplement: Supplemental Information 1 [file peerj-10-13293-s001.xlsx]

## Sheet: list of metabolites
LipidIon	LipidGroup	Class	FattyAcid	FA1	FA2	FA3	CalcMz	IonFormula	QC-1	QC-2	QC-3	QC-4	QC-5	SL_V-1	SL_V-2	SL_V-3	SL-A-1	SL-A-2	SL-A-3	SL-CK-1	SL-CK-2	SL-CK-3	LL_V-1	LL_V-2	LL_V-3	LL-A-1	LL-A-2	LL-A-3	LL-CK-1	LL-CK-2	LL-CK-3
AcHexCmE(16:0)+NH4	AcHexCmE(16:0)+NH4	AcHexCmE	(16:0)	(16:0)			818.687	C50 H92 O7 N1	1.65422e+07	1.43779e+07	1.7066e+07	1.53407e+07	1.47842e+07	9.32311e+06	1.06303e+07	3.67631e+06	1.15675e+07	1.14395e+07	9.39844e+06	1.46805e+07	1.30231e+07	0	1.78584e+07	1.77987e+07	1.17727e+07	1.99409e+07	1.77113e+07	2.22839e+07	1.22277e+07	1.48954e+07	1.28827e+07
BisMePA(16:0_18:3)+NH4	BisMePA(34:3)+NH4	BisMePA	(16:0_18:3)	(16:0)	(18:3)		716.522	C39 H75 O8 N1 P1	1.87859e+08	1.91391e+08	1.68439e+08	1.52156e+08	1.49045e+08	5.84857e+07	4.54177e+07	6.30014e+07	7.13557e+07	4.5411e+07	6.15648e+07	5.37377e+08	6.03516e+08	1.84801e+08	2.84359e+07	3.62179e+07	5.48493e+07	1.65042e+08	1.6906e+08	1.26397e+08	7.56529e+07	6.72884e+07	5.04768e+07
BisMePA(34:3)+Na	BisMePA(34:3)+Na	BisMePA	(16:0_18:3)	(16:0)	(18:3)		721.478	C39 H71 O8 N0 P1 Na1	1.76437e+07	2.11743e+07	1.75497e+07	1.41156e+07	2.08887e+07	8.41932e+06	7.30336e+06	8.64419e+06	4.09863e+06	6.47599e+06	7.03839e+06	4.8786e+07	6.07557e+07	5.40247e+07	2.74384e+06	8.90224e+06	1.11085e+07	2.02039e+07	2.27139e+07	1.67948e+07	1.01774e+07	1.4202e+07	7.67514e+06
BisMePA(18:0_18:2)+NH4	BisMePA(36:2)+NH4	BisMePA	(18:0_18:2)	(18:0)	(18:2)		746.569	C41 H81 O8 N1 P1	2.60495e+07	1.41606e+07	1.52664e+07	1.67056e+07	1.06991e+07	3.97121e+06	2.26804e+06	5.53108e+06	3.11043e+06	1.51681e+06	0	9.07043e+07	8.49713e+07	4.4395e+07	0	2.27447e+06	0	4.07766e+06	5.13688e+06	6.57593e+06	1.04125e+06	2.06567e+06	1.62407e+06
BisMePA(18:1_18:2)+NH4	BisMePA(36:3)+NH4	BisMePA	(18:1_18:2)	(18:1)	(18:2)		744.554	C41 H79 O8 N1 P1	2.55921e+07	3.24205e+07	3.12197e+07	3.67379e+07	6.188e+07	1.47765e+07	1.63154e+07	8.32359e+06	1.26593e+07	1.85016e+07	1.21449e+07	1.036e+08	1.682e+08	0	5.40394e+06	6.4117e+06	2.74045e+06	2.06976e+07	1.76869e+07	1.72e+07	1.65293e+07	3.01856e+07	7.91202e+06
BisMePA(18:2_18:2)+NH4	BisMePA(36:4)+NH4	BisMePA	(18:2_18:2)	(18:2)	(18:2)		742.538	C41 H77 O8 N1 P1	1.3816e+08	1.21818e+08	1.34845e+08	1.05336e+08	1.38675e+08	4.77073e+07	5.70425e+07	5.13509e+07	5.77242e+07	6.3083e+07	5.36015e+07	4.22416e+08	4.82284e+08	4.03518e+07	2.92394e+07	2.70783e+07	1.55635e+07	8.88097e+07	9.26931e+07	8.78082e+07	6.08046e+07	6.3735e+07	5.17376e+07
CL(70:3)+H	CL(70:3)+H	CL	(70:3)	(70:3)			1432.03	C79 H149 O17 P2	4.04849e+07	4.38459e+07	3.62688e+07	3.86919e+07	3.96058e+07	3.22569e+07	4.22674e+07	3.11947e+07	6.20607e+07	4.79286e+07	2.15057e+07	3.50983e+07	3.84593e+07	0	4.35899e+07	4.90263e+07	2.92875e+07	2.68728e+07	2.4836e+07	2.41903e+07	3.16009e+07	5.06169e+07	3.3277e+07
CL(72:6)+H	CL(72:6)+H	CL	(72:6)	(72:6)			1454.01	C81 H147 O17 P2	1.00365e+07	1.20338e+07	1.0904e+07	5.14283e+06	1.16765e+07	8.64896e+06	1.32005e+07	5.67025e+06	1.46316e+07	2.48786e+07	9.06753e+06	7.18783e+06	4.88064e+06	0	7.14793e+06	8.98092e+06	2.01174e+06	6.38628e+06	8.83175e+06	8.38161e+06	8.81095e+06	1.09291e+07	8.05406e+06
Cer(d18:1_16:0+O)+H	Cer(d34:1+O)+H	Cer	(d18:1_16:0+O)	(d18:1)	(16:0+O)		554.514	C34 H68 O4 N1	1.35643e+07	2.41949e+07	8.724e+06	2.38854e+07	2.962e+07	1.53284e+07	1.18169e+07	1.44165e+07	2.33969e+07	2.52699e+07	1.60333e+07	1.50267e+07	1.73465e+07	1.31658e+07	1.19103e+07	5.23661e+07	1.21368e+07	1.00911e+07	2.52757e+07	1.00673e+07	1.73877e+07	1.62903e+07	1.78297e+07
Cer(t18:1_22:0+O)+H	Cer(t40:1+O)+H	Cer	(t18:1_22:0+O)	(t18:1)	(22:0+O)		654.603	C40 H80 O5 N1	4.80498e+07	5.44332e+07	5.34937e+07	4.58344e+07	5.14546e+07	4.26602e+07	4.2963e+07	3.55554e+07	4.3106e+07	5.47514e+07	3.7711e+07	7.92228e+07	6.20922e+07	0	1.00436e+08	9.63228e+07	8.30384e+07	4.20478e+07	4.70069e+07	4.25693e+07	5.63224e+07	5.79988e+07	4.41232e+07
Cer(t18:0_24:0)+H	Cer(t42:0)+H	Cer	(t18:0_24:0)	(t18:0)	(24:0)		668.655	C42 H86 O4 N1	3.25767e+07	3.87435e+07	3.99259e+07	3.80452e+07	3.76885e+07	2.51185e+07	1.80342e+07	1.72891e+07	2.42033e+07	2.43009e+07	2.22153e+07	3.67731e+07	4.41232e+07	5.47428e+07	9.8667e+07	1.01876e+08	6.58728e+07	3.37559e+07	3.76679e+07	3.44317e+07	2.95825e+07	4.05334e+07	2.77896e+07
Cer(t18:1_24:0)+H	Cer(t42:1)+H	Cer	(t18:1_24:0)	(t18:1)	(24:0)		666.639	C42 H84 O4 N1	6.44456e+07	6.4546e+07	6.39594e+07	6.35088e+07	7.01598e+07	5.70335e+07	6.44511e+07	4.81639e+07	5.88365e+07	6.88018e+07	4.3272e+07	8.75713e+07	8.81094e+07	0	9.3588e+07	1.12141e+08	6.23794e+07	5.5816e+07	6.14609e+07	7.26839e+07	7.264e+07	6.67197e+07	6.08037e+07
Cer(t18:1_24:0+O)+H	Cer(t42:1+O)+H	Cer	(t18:1_24:0+O)	(t18:1)	(24:0+O)		682.634	C42 H84 O5 N1	1.36399e+08	1.58451e+08	1.57555e+08	1.24168e+08	1.63345e+08	1.26413e+08	1.31853e+08	9.97911e+07	1.4143e+08	1.53648e+08	9.85662e+07	2.18698e+08	2.13117e+08	2.37771e+07	2.50868e+08	2.4054e+08	1.78653e+08	1.37261e+08	1.46372e+08	1.44902e+08	1.51124e+08	1.63291e+08	1.37156e+08
Cer(t18:1_26:0)+H	Cer(t44:1)+H	Cer	(t18:1_26:0)	(t18:1)	(26:0)		694.671	C44 H88 O4 N1	5.71217e+07	5.52012e+07	6.33796e+07	6.83374e+07	6.01353e+07	5.4354e+07	5.27577e+07	3.5151e+07	5.77041e+07	5.66941e+07	4.84975e+07	8.08192e+07	8.18095e+07	0	8.09931e+07	8.73631e+07	6.18672e+07	5.64714e+07	6.78414e+07	5.81647e+07	6.0545e+07	7.51133e+07	5.17924e+07
CmE(8:0)+H	CmE(8:0)+H	CmE	(8:0)	(8:0)			527.482	C36 H63 O2	5.79168e+07	5.954e+07	5.97285e+07	5.02987e+07	6.63442e+07	0	1.98563e+06	0	5.19858e+06	8.09066e+06	2.97571e+06	0	0	0	4.47334e+08	4.2115e+08	3.51716e+08	905271	2.71314e+06	2.25388e+06	692622	759414	0
CmE(8:0)+H	CmE(8:0)+H	CmE	(8:0)	(8:0)			527.482	C36 H63 O2	0	529439	2.49141e+06	0	0	0	0	0	0	0	0	0	0	0	2.91615e+07	2.53406e+07	1.61372e+07	0	0	0	0	0	0
DG(32:1e)+Na	DG(32:1e)+Na	DG	(32:1e)	(32:1e)			575.501	C35 H68 O4 Na1	1.85727e+08	1.95858e+08	1.98963e+08	1.63102e+08	1.95008e+08	1.44129e+08	2.31269e+08	1.9961e+08	2.32465e+08	2.70636e+08	2.18132e+08	2.21171e+08	2.51311e+08	0	1.69212e+08	1.87183e+08	5.57629e+07	1.34554e+08	1.61951e+08	1.38953e+08	2.00752e+08	2.05534e+08	1.53315e+08
DG(32:2e)+Na	DG(32:2e)+Na	DG	(32:2e)	(32:2e)			573.485	C35 H66 O4 Na1	2.85227e+08	9.41989e+07	1.32647e+08	5.9596e+07	2.84771e+08	1.19653e+08	1.27408e+08	1.16078e+08	2.28811e+08	1.32745e+08	1.27503e+08	2.2179e+08	2.07937e+08	0	1.66728e+08	6.02297e+07	5.09391e+07	1.94107e+08	1.40284e+08	1.92544e+08	1.13035e+08	2.89957e+08	2.13544e+08
DG(18:4_14:0)+Na	DG(32:4)+Na	DG	(18:4_14:0)	(18:4)	(14:0)		583.433	C35 H60 O5 Na1	6.91769e+06	1.04015e+07	8.51445e+06	922594	8.03074e+06	1.39e+07	1.16627e+07	9.35278e+06	1.62899e+07	1.72144e+07	1.16045e+07	1.4716e+07	1.54891e+07	1.17486e+07	5.37809e+06	5.76544e+06	2.772e+06	6.5806e+06	6.83001e+06	4.34241e+06	5.76816e+06	7.563e+06	1.18338e+06
DG(18:0_16:0)+NH4	DG(34:0)+NH4	DG	(18:0_16:0)	(18:0)	(16:0)		614.572	C37 H76 O5 N1	1.92896e+07	1.57438e+07	1.56002e+07	1.85621e+07	1.81999e+07	2.89785e+07	2.87023e+07	2.47055e+07	1.5444e+07	1.45598e+07	1.71752e+07	8.08786e+06	5.97855e+06	2.72111e+07	1.71421e+07	1.84693e+07	9.65363e+06	2.12227e+07	2.47237e+07	2.41918e+07	1.8901e+07	1.98823e+07	1.89225e+07
DG(16:1_18:1)+H	DG(34:2)+H	DG	(16:1_18:1)	(16:1)	(18:1)		593.514	C37 H69 O5	1.35816e+07	9.12869e+06	9.03115e+06	7.17952e+06	1.10798e+07	5.16965e+06	6.12119e+06	7.01994e+06	1.00048e+07	1.06244e+07	1.37227e+07	9.19704e+06	8.3858e+06	0	1.49253e+07	1.02912e+06	1.23326e+06	6.61872e+06	6.27533e+06	4.47291e+06	5.46667e+06	9.98798e+06	5.05625e+06
DG(16:0_18:2)+NH4	DG(34:2)+NH4	DG	(16:0_18:2)	(16:0)	(18:2)		610.541	C37 H72 O5 N1	1.77134e+08	1.85211e+08	1.87676e+08	1.67665e+08	1.79446e+08	2.28703e+08	2.43593e+08	1.80987e+08	2.16448e+08	2.33739e+08	1.8541e+08	1.98224e+08	2.11685e+08	0	1.38878e+08	1.64982e+08	1.15913e+08	2.10462e+08	2.10999e+08	2.3776e+08	2.40897e+08	2.66976e+08	2.05897e+08
DG(34:3e)+Na	DG(34:3e)+Na	DG	(34:3e)	(34:3e)			599.501	C37 H68 O4 Na1	9.25176e+07	8.27149e+07	8.12628e+07	8.18836e+07	1.0418e+08	5.85324e+07	5.31915e+07	5.92966e+07	8.95107e+07	7.25516e+07	5.76979e+07	1.68542e+08	1.5042e+08	0	5.54896e+07	6.94231e+07	2.12407e+07	4.98801e+07	6.20078e+07	5.75894e+07	6.09712e+07	6.81005e+07	5.71821e+07
DG(34:3e)+H	DG(34:3e)+H	DG	(34:3e)	(34:3e)			577.519	C37 H69 O4	9.21079e+07	1.21938e+08	1.20007e+08	8.65205e+07	1.10124e+08	1.11291e+08	1.16704e+08	1.02287e+08	1.67055e+08	1.66979e+08	1.40611e+08	1.84026e+08	2.01086e+08	0	7.8981e+07	8.08213e+07	7.73381e+07	8.255e+07	8.93829e+07	9.01661e+07	1.15827e+08	1.36354e+08	1.06608e+08
DG(34:3e)+H	DG(34:3e)+H	DG	(34:3e)	(34:3e)			577.519	C37 H69 O4	1.67517e+07	1.90819e+07	1.49011e+07	1.60231e+07	1.25282e+07	1.77122e+07	2.15418e+07	1.35753e+07	2.01911e+07	2.7746e+07	2.16362e+07	2.79236e+07	3.11251e+07	0	9.39492e+06	8.62988e+06	2.77021e+06	1.31308e+07	1.31622e+07	1.05304e+07	2.12945e+07	2.36052e+07	1.29148e+07
DG(16:1_18:3)+H	DG(34:4)+H	DG	(16:1_18:3)	(16:1)	(18:3)		589.483	C37 H65 O5	3.26244e+07	3.64543e+07	3.58683e+07	4.02469e+07	4.04859e+07	4.07087e+07	4.11501e+07	3.33364e+07	5.41783e+07	5.60033e+07	4.0011e+07	4.6158e+07	5.72306e+07	0	1.18402e+07	1.27729e+07	8.90748e+06	2.62666e+07	2.72973e+07	2.73769e+07	3.71404e+07	4.30699e+07	3.16592e+07
DG(34:4e)+Na	DG(34:4e)+Na	DG	(34:4e)	(34:4e)			597.485	C37 H66 O4 Na1	1.46703e+08	1.52149e+08	7.10983e+07	1.34058e+08	1.58692e+08	1.1583e+08	1.22655e+08	7.79397e+07	1.42069e+08	1.45659e+08	1.24448e+08	4.41232e+07	5.77992e+07	0	1.20024e+08	1.44622e+08	1.12413e+08	1.03253e+08	1.10199e+08	1.02409e+08	1.21808e+08	1.34126e+08	1.2181e+08
DG(34:4e)+H	DG(34:4e)+H	DG	(34:4e)	(34:4e)			575.503	C37 H67 O4	1.84199e+08	1.90589e+08	1.99053e+08	1.026e+08	5.24068e+07	8.60136e+07	2.32564e+08	5.64819e+07	2.32135e+08	2.62331e+08	2.10769e+08	2.0382e+08	2.44646e+08	0	8.05442e+07	9.81058e+07	1.59016e+08	1.25043e+08	1.47694e+08	3.33813e+07	1.91134e+08	1.88957e+08	1.4514e+08
DG(34:4e)+H	DG(34:4e)+H	DG	(34:4e)	(34:4e)			575.503	C37 H67 O4	1.89435e+08	1.83705e+08	8.87354e+07	7.07288e+07	2.12837e+08	9.15956e+07	1.85823e+07	5.0459e+07	5.0252e+07	3.7569e+07	3.45537e+07	3.816e+08	2.41796e+08	0	1.55767e+07	1.0095e+07	1.98701e+07	1.23381e+08	1.29979e+08	1.18976e+08	5.96631e+07	6.43526e+07	4.80618e+07
DG(34:5e)+Na	DG(34:5e)+Na	DG	(34:5e)	(34:5e)			595.47	C37 H64 O4 Na1	6.49136e+07	9.29066e+07	1.13738e+08	8.23909e+07	9.48291e+07	2.55225e+07	6.7414e+07	7.44451e+07	8.53604e+07	8.15835e+07	3.51433e+07	3.59334e+07	3.32688e+07	0	1.4808e+08	1.43234e+08	1.18834e+08	4.06711e+07	4.95137e+07	2.39988e+07	9.96054e+07	5.4436e+07	6.82136e+07
DG(34:5e)+Na	DG(34:5e)+Na	DG	(34:5e)	(34:5e)			595.47	C37 H64 O4 Na1	2.68818e+07	2.0623e+07	2.08724e+07	2.28249e+07	2.26999e+07	3.4349e+07	2.86935e+07	2.55826e+07	2.97225e+07	3.00271e+07	2.99313e+07	2.65883e+07	2.8855e+07	0	1.14897e+07	1.17599e+07	8.1402e+06	2.09284e+07	2.58076e+07	2.5126e+07	3.56414e+07	3.53808e+07	3.1102e+07
DG(34:5e)+H	DG(34:5e)+H	DG	(34:5e)	(34:5e)			573.488	C37 H65 O4	2.85199e+08	9.41989e+07	1.28539e+08	1.65751e+08	2.84366e+08	1.20985e+08	1.29328e+08	1.15796e+08	2.29996e+08	1.32771e+08	1.2756e+08	2.24575e+08	2.10185e+08	0	2.07648e+08	6.02297e+07	1.83154e+08	1.88674e+08	1.42281e+08	1.91605e+08	2.48513e+08	2.91085e+08	2.12426e+08
DG(18:0_18:2)+NH4	DG(36:2)+NH4	DG	(18:0_18:2)	(18:0)	(18:2)		638.572	C39 H76 O5 N1	2.14474e+07	2.49741e+07	2.44536e+07	2.09333e+07	2.65957e+07	2.67992e+07	1.82976e+07	2.14217e+07	1.89142e+07	2.09494e+07	1.587e+07	1.99487e+07	2.00278e+07	0	1.17366e+07	1.16952e+07	6.11213e+06	8.18102e+07	8.73449e+07	8.93733e+07	1.95704e+07	2.26512e+07	1.75425e+07
DG(18:1_18:2)+NH4	DG(36:3)+NH4	DG	(18:1_18:2)	(18:1)	(18:2)		636.556	C39 H74 O5 N1	1.50852e+07	1.42203e+07	1.92202e+07	1.24177e+07	1.62025e+07	1.45319e+07	1.27941e+07	1.12959e+07	1.94101e+07	4.09299e+07	2.85274e+07	1.88514e+07	1.90016e+07	0	1.36612e+07	2.28319e+07	7.40714e+06	6.18473e+07	4.10182e+07	3.09419e+07	1.87461e+07	3.06884e+07	2.20625e+07
DG(36:3e)+NH4	DG(36:3e)+NH4	DG	(36:3e)	(36:3e)			622.577	C39 H76 O4 N1	1.2556e+08	1.20326e+08	1.17633e+08	1.33622e+08	1.22409e+08	1.41025e+08	1.36391e+08	1.01166e+08	1.52208e+08	1.49849e+08	1.13037e+08	1.10898e+08	1.18291e+08	0	1.52081e+08	1.74406e+08	1.25073e+08	1.31868e+08	1.4109e+08	1.38753e+08	1.34649e+08	1.56642e+08	1.19859e+08
DG(18:2_18:2)+NH4	DG(36:4)+NH4	DG	(18:2_18:2)	(18:2)	(18:2)		634.541	C39 H72 O5 N1	4.70814e+07	5.04868e+07	5.34715e+07	4.69711e+07	4.92974e+07	5.18494e+07	5.54049e+07	4.89489e+07	6.30148e+07	6.22476e+07	4.7388e+07	5.26029e+07	5.07953e+07	0	3.67927e+07	4.59929e+07	3.21253e+07	8.23533e+07	9.45992e+07	9.07543e+07	6.7832e+07	6.98651e+07	6.37504e+07
Hex1Cer(d18:1_16:0+O)+H	Hex1Cer(d34:1+O)+H	Hex1Cer	(d18:1_16:0+O)	(d18:1)	(16:0+O)		716.567	C40 H78 O9 N1	7.43536e+07	8.18356e+07	7.28827e+07	6.701e+07	7.51568e+07	9.51783e+07	9.22381e+07	7.90932e+07	9.6178e+07	1.0157e+08	8.62631e+07	9.21223e+07	9.01805e+07	0	5.61424e+07	5.92155e+07	5.64394e+07	5.35313e+07	5.86347e+07	6.0248e+07	9.76511e+07	1.06228e+08	9.01097e+07
Hex1Cer(t18:1_22:0+O)+H	Hex1Cer(t40:1+O)+H	Hex1Cer	(t18:1_22:0+O)	(t18:1)	(22:0+O)		816.656	C46 H90 O10 N1	5.42789e+07	5.82316e+07	4.9839e+07	5.75756e+07	5.14256e+07	6.91e+07	6.93345e+07	5.73062e+07	7.46832e+07	6.34937e+07	5.6007e+07	6.66221e+07	7.34227e+07	0	3.85821e+07	4.65021e+07	3.01154e+07	3.46819e+07	4.02277e+07	3.92299e+07	6.65292e+07	6.85065e+07	5.66795e+07
LPC(16:0)+H	LPC(16:0)+H	LPC	(16:0)	(16:0)			496.34	C24 H51 O7 N1 P1	5.80298e+06	6.1528e+06	6.11231e+06	251751	7.341e+06	6.02702e+06	6.30458e+06	5.90704e+06	4.41528e+06	5.68068e+06	2.70329e+06	4.57959e+06	5.08658e+06	6.86382e+06	7.45984e+06	5.82117e+06	6.98593e+06	5.02111e+06	7.95889e+06	5.77392e+06	8.99316e+06	8.65785e+06	7.15247e+06
MGDG(16:1_18:2)+Na	MGDG(34:3)+Na	MGDG	(16:1_18:2)	(16:1)	(18:2)		775.533	C43 H76 O10 Na1	1.82081e+08	2.26025e+08	2.2024e+08	1.65847e+08	2.02007e+08	2.36432e+08	2.34893e+08	1.94835e+08	2.67139e+08	2.58288e+08	2.70644e+08	2.68619e+08	2.41076e+08	6.88595e+06	8.25971e+07	7.61344e+07	7.18965e+07	1.79034e+08	1.85085e+08	1.64667e+08	2.28088e+08	2.82507e+08	2.15319e+08
MGDG(18:2_16:2)+Na	MGDG(34:4)+Na	MGDG	(18:2_16:2)	(18:2)	(16:2)		773.517	C43 H74 O10 Na1	1.41186e+08	1.54668e+08	1.55561e+08	1.39267e+08	1.62629e+08	1.8676e+08	1.80605e+08	1.52536e+08	2.26019e+08	2.36973e+08	2.29818e+08	1.69015e+08	2.19371e+08	1.2488e+08	5.70398e+07	6.35141e+07	4.41276e+07	1.18894e+08	1.20414e+08	1.15901e+08	1.68764e+08	1.99685e+08	1.78627e+08
PA(16:0_18:2)+NH4	PA(34:2)+NH4	PA	(16:0_18:2)	(16:0)	(18:2)		690.507	C37 H73 O8 N1 P1	2.59159e+08	2.05956e+08	1.26287e+08	4.01602e+08	3.02615e+08	7.67008e+07	4.41232e+07	4.84263e+07	1.13813e+08	5.56212e+07	1.74884e+08	9.18714e+07	5.88624e+07	7.6695e+07	5.80298e+07	9.89113e+08	1.13384e+09	1.82939e+08	1.92541e+08	1.94987e+08	3.50023e+08	3.98212e+08	3.02952e+08
PA(16:0_18:3)+NH4	PA(34:3)+NH4	PA	(16:0_18:3)	(16:0)	(18:3)		688.491	C37 H71 O8 N1 P1	5.04024e+08	5.23081e+08	4.67111e+08	3.69695e+08	5.77043e+08	6.28266e+08	6.2637e+08	6.66076e+08	5.82264e+08	7.66261e+08	5.70531e+08	6.28673e+07	4.48448e+07	2.72762e+08	5.88707e+08	6.2691e+08	5.49016e+08	3.38313e+08	6.98835e+08	5.58996e+08	7.05539e+08	8.81915e+08	6.44308e+08
PA(18:2_18:2)+NH4	PA(36:4)+NH4	PA	(18:2_18:2)	(18:2)	(18:2)		714.507	C39 H73 O8 N1 P1	2.79356e+08	2.41012e+08	1.93065e+08	2.57653e+08	3.06876e+08	2.32418e+08	2.1618e+08	1.20643e+08	3.07224e+08	2.76554e+08	2.53754e+08	5.19946e+07	3.81159e+07	1.15439e+08	1.53557e+08	1.16741e+08	1.5112e+08	2.13009e+08	1.6715e+08	1.8545e+08	2.88376e+08	3.15105e+08	2.40137e+08
PA(18:3_18:2)+NH4	PA(36:5)+NH4	PA	(18:3_18:2)	(18:3)	(18:2)		712.491	C39 H71 O8 N1 P1	7.09819e+08	6.80209e+08	5.82848e+08	5.40974e+08	6.53975e+08	6.50605e+08	8.61781e+08	7.51263e+08	9.37087e+08	9.57425e+08	8.10333e+08	3.94878e+08	3.88298e+08	1.22065e+08	7.07979e+08	6.73511e+08	5.87025e+08	4.81046e+08	5.40614e+08	5.17815e+08	6.23544e+08	8.57292e+08	7.3499e+08
PA(18:3_18:3)+NH4	PA(36:6)+NH4	PA	(18:3_18:3)	(18:3)	(18:3)		710.476	C39 H69 O8 N1 P1	2.95367e+08	2.67618e+08	3.24277e+08	2.46384e+08	2.90793e+08	4.33906e+08	4.20663e+08	4.24539e+08	3.91863e+08	4.30256e+08	4.31807e+08	1.13437e+08	2.42392e+06	4.37716e+07	4.95541e+08	6.40844e+08	5.60345e+08	2.31847e+08	2.6955e+08	2.57673e+08	3.11299e+08	3.69437e+08	3.36989e+08
PC(30:2)+H	PC(30:2)+H	PC	(30:2)	(30:2)			702.507	C38 H73 O8 N1 P1	1.43325e+08	1.19051e+08	1.17861e+08	2.1017e+08	1.38603e+08	4.70174e+06	5.75374e+07	1.74424e+06	5.83672e+07	6.84258e+07	4.45544e+07	3.2953e+08	3.48442e+08	1.17183e+08	2.96297e+08	3.39221e+08	2.65529e+08	2.4105e+07	4.20309e+07	3.49527e+07	4.91556e+07	3.46709e+08	4.48045e+07
PC(32:5)+H	PC(32:5)+H	PC	(32:5)	(32:5)			724.491	C40 H71 O8 N1 P1	4.46792e+07	5.27713e+07	5.72281e+07	3.40776e+07	4.25588e+07	2.27856e+07	1.56458e+07	1.69844e+07	2.63549e+07	3.40796e+07	1.64526e+07	1.56325e+08	1.5534e+08	2.7184e+08	1.94529e+08	1.7397e+08	1.71769e+08	1.16408e+07	1.36833e+07	1.28458e+07	2.81785e+07	2.88101e+07	2.35691e+07
PC(34:4)+H	PC(34:4)+H	PC	(34:4)	(34:4)			754.538	C42 H77 O8 N1 P1	9.31141e+07	7.46008e+07	6.64007e+07	7.00112e+07	7.98408e+07	1.10688e+08	8.65853e+07	7.84567e+07	9.84172e+07	1.17171e+08	1.06433e+08	7.60789e+07	6.44827e+07	2.06401e+08	5.35021e+07	5.38751e+07	7.29792e+07	9.72252e+07	7.89015e+07	7.98337e+07	9.29518e+07	1.18148e+08	9.14886e+07
PC(34:5)+H	PC(34:5)+H	PC	(34:5)	(34:5)			752.522	C42 H75 O8 N1 P1	6.97817e+07	4.01198e+07	4.17955e+07	8.96805e+06	3.64728e+07	4.63767e+07	4.79326e+07	2.91773e+07	5.00532e+07	5.89726e+07	4.02427e+07	4.04665e+07	4.05565e+07	2.05549e+08	4.96143e+07	3.36842e+07	3.41307e+07	1.86297e+08	3.59539e+07	4.26248e+07	7.56823e+07	9.28137e+07	5.49941e+07
PC(34:6)+H	PC(34:6)+H	PC	(34:6)	(34:6)			750.507	C42 H73 O8 N1 P1	2.5183e+07	2.85793e+07	2.54753e+07	9.07079e+06	2.46452e+07	2.55611e+07	2.55875e+07	1.69521e+07	2.71327e+07	3.40447e+07	2.11539e+07	1.4023e+07	1.62635e+07	9.93058e+07	3.84706e+07	4.50401e+07	3.44867e+07	2.46663e+07	3.06019e+07	2.1841e+07	2.81162e+07	3.70415e+07	2.25262e+07
PC(36:2)+H	PC(36:2)+H	PC	(36:2)	(36:2)			786.601	C44 H85 O8 N1 P1	2.34545e+08	2.49634e+08	2.652e+08	2.38799e+08	2.8453e+08	2.78694e+08	3.29388e+08	2.62991e+08	4.35452e+08	4.4894e+08	3.55975e+08	3.4747e+08	3.54135e+08	0	1.16314e+08	1.12372e+08	9.22051e+07	1.83716e+08	1.84956e+08	1.77887e+08	2.66462e+08	3.22214e+08	2.25379e+08
PC(36:2)+Na	PC(36:2)+Na	PC	(36:2)	(36:2)			808.583	C44 H84 O8 N1 P1 Na1	1.94558e+07	2.32984e+07	1.81822e+07	1.42929e+07	1.99659e+07	2.44386e+07	2.91954e+07	1.88152e+07	3.83771e+07	3.40138e+07	3.33524e+07	2.1024e+07	2.58589e+07	9.53447e+07	9.10127e+06	1.08887e+07	1.18597e+07	1.73313e+07	1.34947e+07	1.50368e+07	2.17576e+07	2.58475e+07	2.00542e+07
PC(36:3)+H	PC(36:3)+H	PC	(36:3)	(36:3)			784.585	C44 H83 O8 N1 P1	1.62914e+08	1.66334e+08	1.75297e+08	3.57402e+08	1.77861e+08	1.93337e+08	1.83212e+08	1.76349e+08	2.6128e+08	2.69397e+08	2.76416e+08	2.27295e+08	4.73996e+08	2.12738e+07	8.86068e+07	8.84407e+07	8.62136e+07	1.29965e+08	1.28685e+08	1.22189e+08	2.03782e+08	2.10028e+08	1.79682e+08
PC(36:3)+Na	PC(36:3)+Na	PC	(36:3)	(36:3)			806.567	C44 H82 O8 N1 P1 Na1	2.17949e+07	1.37021e+07	1.87864e+07	4.80804e+07	1.89269e+07	1.76752e+07	2.13231e+07	1.11266e+07	2.81915e+07	1.12532e+07	2.27625e+07	1.77633e+07	1.79879e+07	3.11559e+07	1.31497e+07	2.86112e+07	1.06205e+07	1.46877e+07	1.59097e+07	1.41305e+07	1.96157e+07	1.52161e+07	1.06034e+07
PC(18:2_18:2)+Na	PC(36:4)+Na	PC	(18:2_18:2)	(18:2)	(18:2)		804.551	C44 H80 O8 N1 P1 Na1	4.41232e+07	4.55848e+07	1.04678e+08	1.27656e+07	5.43768e+07	6.79412e+07	5.28745e+07	1.1335e+08	4.42824e+08	9.68617e+07	1.38601e+08	7.46798e+07	3.53633e+08	5.75654e+07	4.45663e+07	5.41655e+07	2.43824e+08	3.65222e+07	1.86436e+07	8.50741e+07	1.20375e+08	6.24062e+07	4.86329e+07
PC(36:4)+H	PC(36:4)+H	PC	(18:2_18:2)	(18:2)	(18:2)		782.569	C44 H81 O8 N1 P1	1.06906e+09	1.04821e+09	1.01716e+09	8.87377e+08	1.16022e+09	1.357e+09	1.25555e+09	1.0254e+09	1.90161e+09	1.93598e+09	1.4582e+09	1.07808e+09	1.20077e+09	2.21511e+07	6.2362e+08	6.23943e+08	4.80434e+08	7.57456e+08	7.94929e+08	8.00269e+08	1.30651e+09	1.31471e+09	1.04142e+09
PC(38:5)+H	PC(38:5)+H	PC	(38:5)	(38:5)			808.585	C46 H83 O8 N1 P1	8.65127e+06	8.07512e+06	1.12527e+07	1.1281e+07	1.09664e+07	1.47594e+07	2.02244e+07	1.10002e+07	2.27513e+07	2.36476e+07	1.18284e+07	1.18729e+07	1.11155e+07	1.82175e+07	3.81803e+06	4.7501e+06	4.98681e+06	5.51322e+06	3.97465e+06	4.71325e+06	1.38647e+07	1.41097e+07	1.19643e+07
PE(16:0_16:1)+H	PE(32:1)+H	PE	(16:0_16:1)	(16:0)	(16:1)		690.507	C37 H73 O8 N1 P1	1.89872e+08	2.43627e+08	4.15163e+08	1.72822e+08	2.04411e+08	3.10652e+08	1.85837e+08	2.25608e+08	2.4547e+08	1.78815e+08	1.74884e+08	8.35054e+07	5.71122e+07	4.64609e+08	1.16826e+09	1.15921e+09	1.16628e+09	1.99188e+07	2.54289e+07	2.26713e+08	3.04268e+08	7.45711e+07	4.64775e+06
PE(32:1)+Na	PE(32:1)+Na	PE	(16:0_16:1)	(16:0)	(16:1)		712.489	C37 H72 O8 N1 P1 Na1	1.44573e+07	2.15508e+07	1.84626e+07	2.16341e+07	1.71517e+07	4.65417e+06	2.20892e+06	6.5454e+06	7.04632e+06	3.42846e+06	1.12867e+07	6.8682e+06	9.47213e+06	1.7164e+08	1.01615e+08	7.96992e+07	1.25346e+08	1.5994e+06	2.53577e+07	8.99652e+06	8.92634e+06	7.03976e+06	9.92276e+06
PE(16:1_16:1)+H	PE(32:2)+H	PE	(16:1_16:1)	(16:1)	(16:1)		688.491	C37 H71 O8 N1 P1	5.04024e+08	5.23081e+08	4.67111e+08	3.69695e+08	5.77043e+08	6.28266e+08	6.2637e+08	6.66076e+08	5.82264e+08	7.66261e+08	5.70531e+08	6.28673e+07	4.48448e+07	2.72762e+08	5.88707e+08	6.2691e+08	5.49016e+08	3.38313e+08	6.98835e+08	5.58996e+08	7.05539e+08	8.81915e+08	6.44308e+08
PE(16:0_18:2)+H	PE(34:2)+H	PE	(16:0_18:2)	(16:0)	(18:2)		716.522	C39 H75 O8 N1 P1	1.3277e+09	1.49538e+09	1.31251e+09	1.17294e+09	1.32086e+09	1.42857e+09	1.38472e+09	1.265e+09	1.69998e+09	1.45064e+09	1.36606e+09	1.11057e+09	1.16906e+09	7.45773e+08	1.84749e+09	1.99913e+09	9.80874e+08	1.03512e+09	1.10587e+09	1.03841e+09	1.24694e+09	1.51294e+09	1.1776e+09
PE(16:0_18:2)+Na	PE(34:2)+Na	PE	(16:0_18:2)	(16:0)	(18:2)		738.504	C39 H74 O8 N1 P1 Na1	1.43406e+08	1.5805e+08	1.58246e+08	1.24638e+08	1.59786e+08	1.59958e+08	1.56727e+08	1.50074e+08	2.02836e+08	1.49479e+08	1.84081e+08	1.34828e+08	1.27406e+08	1.42443e+08	2.02392e+08	2.09761e+08	2.19358e+08	1.24887e+08	1.58435e+08	1.29422e+08	1.29855e+08	1.51385e+08	1.37176e+08
PE(16:0_18:3)+H	PE(34:3)+H	PE	(16:0_18:3)	(16:0)	(18:3)		714.507	C39 H73 O8 N1 P1	7.03659e+08	7.86808e+08	7.8688e+08	6.36976e+08	8.41316e+08	9.60986e+08	9.74613e+08	9.36755e+08	1.06324e+09	1.1794e+09	1.105e+09	7.46452e+08	8.13055e+08	6.72478e+07	7.12953e+08	8.07173e+08	6.6502e+08	7.58292e+08	8.07836e+08	7.29887e+08	8.69737e+08	1.0116e+09	8.71843e+08
PE(34:3)+Na	PE(34:3)+Na	PE	(16:0_18:3)	(16:0)	(18:3)		736.489	C39 H72 O8 N1 P1 Na1	7.04387e+07	7.94783e+07	5.72837e+07	5.33637e+07	6.61909e+07	8.47987e+07	9.38278e+07	8.85406e+07	8.00222e+07	7.8588e+07	8.89981e+07	4.87863e+07	5.6855e+07	1.1749e+08	5.56812e+07	7.67274e+07	6.29063e+07	7.84098e+07	8.13357e+07	7.29796e+07	7.03209e+07	7.7362e+07	7.72937e+07
PE(34:4)+H	PE(34:4)+H	PE	(34:4)	(34:4)			712.491	C39 H71 O8 N1 P1	6.94799e+08	6.80301e+08	5.87858e+08	5.51631e+08	6.63691e+08	8.50222e+08	8.24061e+08	7.50936e+08	9.21711e+08	9.42908e+08	7.32022e+08	3.94992e+08	3.83027e+08	1.7215e+08	7.1133e+08	6.61248e+08	5.86889e+08	4.81105e+08	5.40547e+08	5.20074e+08	7.95904e+08	8.57157e+08	7.29805e+08
PE(34:5)+H	PE(34:5)+H	PE	(34:5)	(34:5)			710.476	C39 H69 O8 N1 P1	2.95367e+08	9.88715e+07	3.24277e+08	2.10047e+07	1.2212e+08	4.33906e+08	4.20663e+08	4.24539e+08	3.91863e+08	4.30256e+08	4.31807e+08	1.14337e+08	1.08997e+08	4.37716e+07	4.95541e+08	6.40844e+08	5.60345e+08	2.31847e+08	1.58296e+08	1.26747e+08	1.62026e+08	3.69437e+08	3.36989e+08
PE(34:5e)+Li	PE(34:5e)+Li	PE	(34:5e)	(34:5e)			702.504	C39 H70 O7 N1 P1 Li1	1.42635e+08	1.26795e+08	1.51405e+08	1.07305e+08	1.80425e+08	8.98099e+07	9.29815e+07	1.10937e+08	1.22013e+08	1.21689e+08	6.35799e+07	3.73049e+08	4.0123e+08	1.53857e+08	3.15237e+08	3.62854e+08	3.66236e+08	6.13074e+07	4.20626e+07	3.49527e+07	8.61244e+07	6.46653e+07	7.35645e+07
PE(35:3)+H	PE(35:3)+H	PE	(35:3)	(35:3)			728.522	C40 H75 O8 N1 P1	7.76803e+07	8.35754e+07	7.03179e+07	7.13808e+07	8.06635e+07	3.71008e+07	3.87432e+07	3.46515e+07	4.76428e+07	4.50523e+07	7.39384e+07	1.95091e+08	1.9431e+08	7.79947e+08	1.19567e+08	1.21432e+08	1.08615e+08	5.10757e+07	5.86493e+07	3.7077e+07	4.89209e+07	4.4097e+07	4.7954e+07
PE(35:4)+H	PE(35:4)+H	PE	(35:4)	(35:4)			726.507	C40 H73 O8 N1 P1	1.34312e+08	1.44575e+08	1.09389e+08	1.05788e+08	1.37509e+08	5.57656e+07	4.09099e+07	5.60886e+07	6.59463e+07	6.29117e+07	6.82342e+07	3.12925e+08	3.34294e+08	6.22714e+07	2.45296e+08	2.63908e+08	2.2112e+08	5.99983e+07	7.08519e+07	4.21278e+07	7.11266e+07	8.43433e+07	6.83517e+07
PE(35:4e)+Li	PE(35:4e)+Li	PE	(35:4e)	(35:4e)			718.536	C40 H74 O7 N1 P1 Li1	8.68387e+07	8.80239e+07	8.29227e+07	8.53027e+07	8.54071e+07	5.29578e+07	5.0808e+07	3.73578e+07	6.19741e+07	5.52499e+07	5.46637e+07	1.33641e+06	5.21706e+07	1.09059e+07	3.67873e+08	3.9009e+08	2.97788e+08	3.97823e+07	3.67512e+07	4.00438e+07	5.19594e+07	5.40928e+07	4.0018e+07
PE(35:6)+Li	PE(35:6)+Li	PE	(35:6)	(35:6)			728.484	C40 H68 O8 N1 P1 Li1	2.49828e+07	2.47446e+07	2.54922e+07	729586	2.74761e+07	1.81219e+07	1.77893e+07	1.94024e+07	1.72106e+07	1.92884e+07	1.62163e+07	3.6465e+07	2.4739e+07	2.85945e+07	7.03232e+07	6.74186e+07	5.6269e+07	2.90648e+07	3.82059e+07	3.49132e+07	2.37348e+07	2.85595e+07	1.876e+07
PE(18:0_18:2)+H	PE(36:2)+H	PE	(18:0_18:2)	(18:0)	(18:2)		744.554	C41 H79 O8 N1 P1	6.41335e+07	6.90728e+07	7.31567e+07	7.14579e+07	6.3049e+07	9.02603e+07	8.82637e+07	6.82943e+07	1.03478e+08	9.87827e+07	9.08649e+07	9.99666e+07	9.42465e+07	0	5.99933e+07	6.31645e+07	4.14883e+07	6.23537e+07	5.45826e+07	5.77919e+07	7.76513e+07	9.38176e+07	6.74924e+07
PE(36:3)+H	PE(36:3)+H	PE	(36:3)	(36:3)			742.538	C41 H77 O8 N1 P1	1.36878e+08	1.17784e+08	1.29577e+08	1.21961e+08	1.3038e+08	4.98713e+07	6.11196e+07	5.12763e+07	5.14725e+07	6.3209e+07	5.06029e+07	4.22637e+08	4.79329e+08	1.12278e+09	2.69599e+07	2.38093e+07	2.79351e+07	9.25408e+07	9.56016e+07	8.7717e+07	5.49648e+07	5.47863e+07	5.31433e+07
PE(18:1_18:2)+H	PE(36:3)+H	PE	(18:1_18:2)	(18:1)	(18:2)		742.538	C41 H77 O8 N1 P1	1.48188e+07	5.85504e+07	6.32214e+07	5.17539e+07	5.51701e+07	5.90668e+07	4.92332e+07	4.51582e+07	6.51291e+07	7.88712e+07	5.2447e+07	6.28018e+07	6.46644e+07	1.48869e+08	7.67687e+06	4.28311e+07	3.18706e+07	5.05178e+07	3.74595e+07	8.338e+07	5.52294e+07	5.74761e+07	5.08638e+07
PE(18:2_18:2)+H	PE(36:4)+H	PE	(18:2_18:2)	(18:2)	(18:2)		740.522	C41 H75 O8 N1 P1	3.31411e+08	3.13321e+08	3.12031e+08	2.63124e+08	3.28776e+08	3.49296e+08	3.73217e+08	2.61207e+08	4.69423e+08	4.5389e+08	4.4504e+08	2.56797e+08	2.70089e+08	1.03933e+08	2.73431e+08	2.76601e+08	2.31302e+08	2.61412e+08	2.3223e+08	3.00853e+08	3.16576e+08	3.91274e+08	2.88752e+08
PE(18:3_18:2)+H	PE(36:5)+H	PE	(18:3_18:2)	(18:3)	(18:2)		738.507	C41 H73 O8 N1 P1	3.56778e+07	4.34889e+07	4.41232e+07	6.9475e+06	3.85836e+07	4.27693e+07	4.52663e+07	3.4383e+07	8.9053e+07	4.57666e+07	4.03037e+07	3.32951e+07	2.95486e+07	1.31245e+07	7.80754e+07	8.42104e+07	6.04831e+07	3.92221e+07	9.51833e+07	3.55723e+07	4.65859e+07	7.50566e+07	3.71749e+07
PE(38:1)+K	PE(38:1)+K	PE	(38:1)	(38:1)			812.557	C43 H84 O8 N1 P1 K1	2.2332e+07	2.04603e+07	1.86211e+07	1.95933e+07	2.12082e+07	3.49464e+07	2.88723e+07	2.31989e+07	2.71903e+07	2.8851e+07	3.19768e+07	2.73909e+07	3.00057e+07	1.7732e+08	1.19047e+07	7.38266e+06	3.80295e+06	1.93899e+07	1.18043e+07	2.07527e+07	2.34729e+07	2.52738e+07	2.52328e+07
PE(42:3)+H	PE(42:3)+H	PE	(42:3)	(42:3)			826.632	C47 H89 O8 N1 P1	4.3722e+06	6.03854e+06	1.07972e+07	8.51591e+06	7.70986e+06	8.21275e+06	6.41203e+06	6.67167e+06	1.6681e+07	1.58556e+07	5.63538e+06	9.08601e+06	1.03758e+07	1.27536e+08	9.13624e+06	7.77656e+06	1.01806e+07	1.82314e+07	1.44266e+07	5.11602e+06	1.26738e+07	5.38358e+06	7.90653e+06
PG(16:0_16:0)+NH4	PG(32:0)+NH4	PG	(16:0_16:0)	(16:0)	(16:0)		740.544	C38 H79 O10 N1 P1	1.12345e+08	1.07473e+08	1.2986e+08	9.20336e+07	1.17615e+08	2.51547e+08	1.62828e+08	1.54643e+08	1.41354e+08	1.62091e+08	1.25596e+08	1.41134e+08	1.53181e+08	2.29398e+08	1.22228e+08	1.00931e+08	8.17083e+07	9.57743e+07	1.17196e+08	9.36671e+07	1.6676e+08	1.62314e+08	1.33339e+08
PG(16:0_16:0)+Na	PG(32:0)+Na	PG	(16:0_16:0)	(16:0)	(16:0)		745.499	C38 H75 O10 N0 P1 Na1	2.41458e+07	2.74811e+07	3.63094e+07	2.12856e+07	2.956e+07	4.74417e+07	4.56995e+07	5.54226e+07	3.41204e+07	4.22432e+07	4.96278e+07	2.47809e+07	2.50166e+07	2.49062e+08	2.77464e+07	3.01255e+07	2.59143e+07	3.3359e+07	2.83773e+07	2.80834e+07	3.43538e+07	3.77701e+07	4.71241e+07
PG(16:1_18:1)+NH4	PG(34:2)+NH4	PG	(16:1_18:1)	(16:1)	(18:1)		764.544	C40 H79 O10 N1 P1	7.04961e+07	6.2608e+07	6.4891e+07	6.20746e+07	7.61702e+07	7.05914e+07	7.77876e+07	6.6661e+07	7.08028e+07	9.4655e+07	8.03051e+07	8.96788e+07	1.08672e+08	2.22512e+08	4.20625e+07	4.18892e+07	4.11706e+07	5.79766e+07	6.80092e+07	5.59061e+07	6.86766e+07	7.51617e+07	6.8155e+07
PG(38:6)+(CH3CH2)3NH	PG(38:6)+(CH3CH2)3NH	PG	(38:6)	(38:6)			910.641	C50 H91 O10 N2 P1	4.32791e+07	2.65316e+07	2.98356e+07	2.35195e+07	3.34674e+07	4.67593e+07	4.784e+07	4.65947e+07	3.09083e+07	3.84105e+07	3.76229e+07	3.61688e+07	3.94222e+07	7.02115e+07	9.22081e+06	6.03428e+06	1.11473e+07	2.77693e+07	2.27849e+07	2.01646e+07	3.8491e+07	4.24846e+07	3.2754e+07
PG(40:7)+(CH3CH2)3NH	PG(40:7)+(CH3CH2)3NH	PG	(40:7)	(40:7)			936.656	C52 H93 O10 N2 P1	8.23397e+07	9.31768e+07	8.92767e+07	8.59303e+07	9.14655e+07	1.26007e+08	1.34117e+08	1.02184e+08	1.24711e+08	1.24463e+08	1.28731e+08	1.42613e+08	1.303e+08	5.67047e+08	3.34618e+07	3.47311e+07	4.87385e+07	6.88363e+07	7.68752e+07	7.38043e+07	1.12553e+08	1.27408e+08	9.70208e+07
PI(40:2)+NH4	PI(40:2)+NH4	PI	(40:2)	(40:2)			936.654	C49 H95 O13 N1 P1	1.10087e+08	9.61221e+07	1.09524e+08	1.00972e+08	9.4949e+07	1.13842e+08	1.07814e+08	9.23628e+07	1.08127e+08	1.14495e+08	1.20936e+08	1.27767e+08	1.09576e+08	1.65572e+08	4.35465e+07	3.68043e+07	5.04469e+07	6.60503e+07	1.02203e+08	8.36844e+07	1.06093e+08	1.14168e+08	8.96529e+07
PIP(16:0_16:0)+(CH3CH2)3NH	PIP(32:0)+(CH3CH2)3NH	PIP	(16:0_16:0)	(16:0)	(16:0)		1006.62	C47 H96 O16 N2 P2	8.49139e+06	6.33605e+06	9.36829e+06	8.48289e+06	9.42325e+06	1.67537e+07	1.223e+07	1.27451e+07	1.30036e+07	1.34031e+07	1.2175e+07	8.27895e+06	6.07485e+06	0	866512	1.7614e+06	0	9.66997e+06	6.84368e+06	9.9008e+06	6.95845e+06	1.06061e+07	6.1346e+06
PIP(34:3)+(CH3CH2)3NH	PIP(34:3)+(CH3CH2)3NH	PIP	(34:3)	(34:3)			1028.61	C49 H94 O16 N2 P2	5.73238e+07	5.60328e+07	5.47907e+07	98.395	6.07161e+07	1.05413e+08	9.89631e+07	7.7441e+07	9.67266e+07	1.05972e+08	7.80276e+07	4.9747e+07	4.82757e+07	0	8.59046e+06	9.16396e+06	5.5842e+06	4.70822e+07	4.61485e+07	4.48407e+07	6.90355e+07	8.11071e+07	6.36651e+07
PIP(41:3)+NH4	PIP(41:3)+NH4	PIP	(41:3)	(41:3)			1028.62	C50 H96 O16 N1 P2	5.47004e+07	5.56817e+07	5.47802e+07	86.3639	5.8574e+07	1.05225e+08	9.90965e+07	7.77903e+07	9.67166e+07	1.0592e+08	7.82647e+07	4.96051e+07	4.74785e+07	0	8.57581e+06	9.30633e+06	5.42598e+06	4.46847e+07	4.54308e+07	4.41232e+07	6.8447e+07	8.10996e+07	6.34359e+07
PS(45:2)+Na	PS(45:2)+Na	PS	(45:2)	(45:2)			936.666	C51 H96 O10 N1 P1 Na1	9.97127e+07	1.03967e+08	9.37687e+07	9.90533e+07	9.72127e+07	1.15362e+08	1.21738e+08	1.03471e+08	1.2758e+08	1.34426e+08	1.26168e+08	1.37246e+08	1.23671e+08	1.15628e+08	4.60105e+07	3.79376e+07	5.00718e+07	6.23219e+07	8.89142e+07	7.51245e+07	1.08641e+08	1.28115e+08	8.95104e+07
SPH(t16:0)+H	SPH(t16:0)+H	SPH	(t16:0)	(t16:0)			290.269	C16 H36 O3 N1	7.08872e+07	7.77491e+07	7.09276e+07	7.63462e+07	7.65221e+07	6.65041e+06	6.4412e+06	4.05834e+06	8.18402e+06	9.23514e+06	4.85729e+06	8.76221e+06	6.82691e+06	0	4.57129e+07	4.76042e+07	4.54487e+07	4.93416e+08	5.23647e+08	5.83605e+08	5.77496e+06	7.81043e+06	5.50085e+06
SPH(t16:0)+H-H2O	SPH(t16:0)+H-H2O	SPH	(t16:0)	(t16:0)			272.258	C16 H34 O2 N1	1.36283e+07	1.07465e+07	1.44165e+07	1.11856e+07	1.20761e+07	4.35153e+06	4.47488e+06	2.28011e+06	5.00387e+06	5.13115e+06	2.03321e+06	2.78138e+06	2.56586e+06	0	3.40023e+07	2.83434e+07	2.82453e+07	3.70137e+07	4.08474e+07	4.48407e+07	3.18041e+06	2.54517e+06	2.20405e+06
SPH(t17:0)+H	SPH(t17:0)+H	SPH	(t17:0)	(t17:0)			304.285	C17 H38 O3 N1	5.45912e+06	4.21034e+06	4.05587e+06	5.27989e+06	2.99607e+06	553443	456525	525124	996955	1.08114e+06	613172	447625	401860	0	1.23623e+06	1.27025e+06	1.03977e+06	4.12037e+07	5.87061e+07	5.57881e+07	1.62153e+06	1.8175e+06	1.3126e+06
SPHP(t16:0)+H	SPHP(t16:0)+H	SPHP	(t16:0)	(t16:0)			370.235	C16 H37 O6 N1 P1	1.52633e+07	1.77971e+07	2.30495e+07	1.4207e+07	1.62901e+07	8.1898e+06	7.76606e+06	2.45249e+06	8.35556e+06	2.42854e+06	7.47907e+06	3.35409e+06	3.94844e+06	3.62771e+06	5.55029e+07	3.80897e+07	3.953e+07	4.812e+07	4.65292e+07	5.14962e+07	5.37924e+07	5.76663e+07	4.57627e+07
SiE()+H-H2O	SiE()+H-H2O	SiE	()				397.383	C29 H49 O0	2.37975e+07	2.97198e+07	2.31077e+07	2.48872e+07	2.79728e+07	1.78429e+07	2.11569e+07	1.8512e+07	2.89659e+07	2.58714e+07	2.26236e+07	2.36267e+07	2.20951e+07	0	5.16875e+07	5.53086e+07	3.48681e+07	3.08647e+07	2.73582e+07	3.21148e+07	2.67487e+07	3.32679e+07	1.91972e+07
StE(18:3)+NH4	StE(18:3)+NH4	StE	(18:3)	(18:3)			690.618	C47 H80 O2 N1	1.33362e+08	1.29723e+08	1.19183e+08	1.17874e+08	1.40016e+08	1.45488e+08	1.4727e+08	1.26857e+08	1.44466e+08	1.56216e+08	1.12008e+08	1.05557e+08	8.53327e+07	0	2.02328e+08	2.17098e+08	1.54333e+08	8.77004e+07	1.05668e+08	9.58167e+07	1.71998e+08	1.89198e+08	1.65594e+08
TG(14:1e_10:2_10:3)+H	TG(34:6e)+H	TG	(14:1e_10:2_10:3)	(14:1e)	(10:2)	(10:3)	585.451	C37 H61 O5	5.5726e+07	5.67529e+07	4.64178e+07	1.99881e+06	4.38199e+07	3.9914e+07	3.70051e+07	3.05052e+07	2.64601e+07	2.95179e+07	4.03346e+07	4.05454e+07	6.24364e+07	3.35841e+07	1.00595e+08	1.02323e+08	8.30475e+07	5.44726e+07	4.86925e+07	5.12994e+07	3.45717e+07	4.15872e+07	4.63339e+07
TG(14:1_10:3_10:4)+H	TG(34:8)+H	TG	(14:1_10:3_10:4)	(14:1)	(10:3)	(10:4)	595.399	C37 H55 O6	5.84127e+07	6.15526e+07	6.35961e+07	6.64691e+07	6.53091e+07	5.59246e+07	5.74797e+07	5.32258e+07	4.53873e+07	5.13059e+07	4.99815e+07	6.33363e+07	5.78997e+07	7.90291e+07	9.45143e+07	8.92429e+07	8.01468e+07	8.02753e+07	9.3799e+07	8.6294e+07	6.5165e+07	7.97853e+07	6.29209e+07
TG(14:1e_10:3_10:4)+H	TG(34:8e)+H	TG	(14:1e_10:3_10:4)	(14:1e)	(10:3)	(10:4)	581.42	C37 H57 O5	1.31098e+08	1.41011e+08	1.43504e+08	3.37355e+06	1.34221e+08	1.30275e+08	1.3091e+08	1.04739e+08	1.3563e+08	1.38172e+08	1.21471e+08	2.18463e+08	2.11888e+08	3.89046e+07	5.05857e+07	5.48692e+07	4.66407e+07	1.5557e+08	1.67607e+08	1.58485e+08	2.24099e+08	2.53936e+08	2.13605e+08
TG(15:0_10:3_10:3)+H	TG(35:6)+H	TG	(15:0_10:3_10:3)	(15:0)	(10:3)	(10:3)	613.446	C38 H61 O6	1.14884e+07	1.96352e+07	1.58095e+07	3.06023e+06	1.17553e+07	2.27201e+07	1.81476e+07	1.7711e+07	3.21806e+07	3.18878e+07	1.86334e+07	1.31214e+07	1.83046e+07	3.51765e+08	3.21912e+06	1.75275e+06	6.13555e+06	1.57163e+07	2.39159e+07	2.37842e+07	1.51236e+07	2.18658e+07	2.83883e+07
TG(16:0_14:0_16:0)+NH4	TG(46:0)+NH4	TG	(16:0_14:0_16:0)	(16:0)	(14:0)	(16:0)	796.739	C49 H98 O6 N1	3.10153e+07	3.30345e+07	2.31112e+07	5.14993e+07	3.12231e+07	4.23721e+07	3.80822e+07	4.5581e+07	2.66192e+07	2.74754e+07	4.30611e+07	2.13371e+07	2.27584e+07	7.78473e+08	3.18656e+07	3.56859e+07	5.07967e+07	3.52888e+07	4.09365e+07	4.2608e+07	3.11292e+07	3.79077e+07	3.3625e+07
TG(16:0_14:0_16:1)+NH4	TG(46:1)+NH4	TG	(16:0_14:0_16:1)	(16:0)	(14:0)	(16:1)	794.723	C49 H96 O6 N1	3.02424e+07	3.55122e+07	3.2844e+07	4.86624e+07	3.49417e+07	3.92691e+07	4.168e+07	4.41275e+07	2.69924e+07	3.07706e+07	4.70904e+07	1.99852e+07	2.8503e+07	7.69512e+08	3.35342e+07	3.54598e+07	4.71015e+07	4.82523e+07	4.41232e+07	4.50047e+07	3.53933e+07	3.98537e+07	3.19752e+07
TG(18:2_10:4_18:2)+K	TG(46:8)+K	TG	(18:2_10:4_18:2)	(18:2)	(10:4)	(18:2)	801.543	C49 H78 O6 K1	5.5533e+07	6.40647e+07	5.98719e+07	4.41232e+07	7.23023e+07	6.10307e+07	6.27028e+07	6.01621e+07	6.21353e+07	6.76279e+07	6.74973e+07	5.72673e+07	5.99632e+07	4.70255e+07	2.72912e+07	2.97776e+07	3.40967e+07	6.5531e+07	7.36232e+07	5.94595e+07	7.19267e+07	8.58284e+07	7.01435e+07
TG(15:0_16:0_16:0)+NH4	TG(47:0)+NH4	TG	(15:0_16:0_16:0)	(15:0)	(16:0)	(16:0)	810.755	C50 H100 O6 N1	2.89148e+07	2.87988e+07	2.29544e+07	6.14687e+07	2.74287e+07	2.65856e+07	2.77894e+07	4.18187e+07	1.99187e+07	2.1136e+07	2.71267e+07	1.77968e+07	1.996e+07	5.70815e+08	2.76502e+07	2.68141e+07	4.31745e+07	3.67837e+07	4.46454e+07	3.84382e+07	3.89279e+07	3.10162e+07	2.35021e+07
TG(15:0_16:0_16:1)+NH4	TG(47:1)+NH4	TG	(15:0_16:0_16:1)	(15:0)	(16:0)	(16:1)	808.739	C50 H98 O6 N1	3.49187e+07	3.35819e+07	3.23556e+07	5.96372e+07	3.31759e+07	4.12511e+07	4.16954e+07	5.28846e+07	2.98225e+07	3.36016e+07	5.78726e+07	2.20726e+07	2.73974e+07	8.55433e+08	3.84748e+07	3.42824e+07	4.81677e+07	5.13601e+07	4.90171e+07	5.29139e+07	3.50977e+07	3.71207e+07	3.74092e+07
TG(22:5_11:3_14:3)+Na	TG(47:11)+Na	TG	(22:5_11:3_14:3)	(22:5)	(11:3)	(14:3)	793.538	C50 H74 O6 Na1	1.40793e+08	1.15584e+08	8.73101e+07	1.38833e+08	1.45188e+08	1.08065e+08	1.07209e+08	1.04411e+08	1.02193e+08	9.71281e+07	1.00074e+08	1.2413e+08	1.41986e+08	9.28652e+07	5.32591e+07	5.3672e+07	4.63502e+07	1.36208e+08	1.42051e+08	1.45733e+08	1.21083e+08	1.34167e+08	1.43389e+08
TG(47:12)+Na	TG(47:12)+Na	TG	(47:12)	(47:12)			791.522	C50 H72 O6 Na1	8.32463e+06	1.09062e+07	1.19763e+07	7.38488e+06	8.65569e+06	4.8035e+06	5.22549e+06	506947	6.318e+06	3.0718e+06	4.34633	3.32226e+07	3.85831e+07	1.93283e+07	1.03301e+06	2.09308e+06	32585.7	1.84494e+06	5.02527e+06	6.56475e+06	8.09431e+06	3.42507e+06	2.48993e+06
TG(16:0_16:0_16:0)+NH4	TG(48:0)+NH4	TG	(16:0_16:0_16:0)	(16:0)	(16:0)	(16:0)	824.77	C51 H102 O6 N1	3.65717e+07	3.2632e+07	3.19781e+07	7.55011e+07	3.61055e+07	4.19207e+07	4.87793e+07	5.50228e+07	3.11414e+07	3.66516e+07	4.55906e+07	2.71133e+07	2.99174e+07	9.16057e+08	4.08127e+07	3.73588e+07	5.6899e+07	6.10957e+07	4.10047e+07	6.59115e+07	4.14803e+07	4.15117e+07	3.4709e+07
TG(16:0_16:0_16:1)+NH4	TG(48:1)+NH4	TG	(16:0_16:0_16:1)	(16:0)	(16:0)	(16:1)	822.755	C51 H100 O6 N1	5.42967e+07	5.05166e+07	4.05882e+07	1.01347e+08	5.28344e+07	6.48435e+07	5.14844e+07	6.28082e+07	3.79337e+07	4.38435e+07	6.19281e+07	2.90698e+07	3.6233e+07	1.02636e+09	5.20892e+07	4.55113e+07	8.19241e+07	6.34449e+07	6.67857e+07	6.15555e+07	4.46863e+07	4.94283e+07	4.76958e+07
TG(16:0_16:1_16:1)+NH4	TG(48:2)+NH4	TG	(16:0_16:1_16:1)	(16:0)	(16:1)	(16:1)	820.739	C51 H98 O6 N1	2.82292e+07	2.65834e+07	2.93539e+07	3.68715e+07	3.52575e+07	3.93518e+07	4.35095e+07	4.16851e+07	2.55701e+07	3.27862e+07	4.78742e+07	2.13742e+07	2.67274e+07	6.54448e+08	3.59382e+07	3.68729e+07	4.41232e+07	4.17802e+07	4.81058e+07	4.07391e+07	3.3038e+07	3.70567e+07	2.98612e+07
TG(16:0_16:0_17:1)+NH4	TG(49:1)+NH4	TG	(16:0_16:0_17:1)	(16:0)	(16:0)	(17:1)	836.77	C52 H102 O6 N1	2.67254e+07	2.54153e+07	2.36313e+07	4.81748e+07	2.50496e+07	3.9308e+07	3.29823e+07	4.70394e+07	2.63252e+07	2.73181e+07	4.26159e+07	2.08598e+07	2.23062e+07	7.6535e+08	2.86716e+07	2.59208e+07	4.37458e+07	3.77508e+07	4.11655e+07	3.64684e+07	2.91012e+07	3.53463e+07	3.12028e+07
TG(49:2)+NH4	TG(49:2)+NH4	TG	(49:2)	(49:2)			834.755	C52 H100 O6 N1	1.93974e+07	1.80411e+07	1.35453e+07	3.20347e+07	2.58528e+07	2.66227e+07	2.59606e+07	3.75019e+07	1.8126e+07	1.41849e+07	2.89377e+07	1.37404e+07	1.72486e+07	4.76745e+08	2.7787e+07	2.16087e+07	2.3985e+07	2.57527e+07	3.16157e+07	2.31565e+07	2.41906e+07	2.28366e+07	2.23265e+07
TG(16:0_16:0_18:1)+NH4	TG(50:1)+NH4	TG	(16:0_16:0_18:1)	(16:0)	(16:0)	(18:1)	850.786	C53 H104 O6 N1	4.2996e+07	3.41932e+07	4.04444e+07	9.61102e+07	4.38294e+07	5.06786e+07	5.44206e+07	6.28275e+07	3.84418e+07	3.41116e+07	5.98181e+07	3.12132e+07	3.29379e+07	9.71149e+08	4.23186e+07	4.07897e+07	6.30007e+07	5.25855e+07	5.83405e+07	5.69452e+07	4.70164e+07	4.63907e+07	4.44915e+07
TG(16:0_16:0_18:2)+NH4	TG(50:2)+NH4	TG	(16:0_16:0_18:2)	(16:0)	(16:0)	(18:2)	848.77	C53 H102 O6 N1	4.6949e+07	4.41232e+07	4.36234e+07	5.02031e+07	5.03611e+07	6.48169e+07	6.38413e+07	5.7857e+07	4.41232e+07	4.4884e+07	6.30525e+07	3.45752e+07	3.52986e+07	9.51466e+08	5.43131e+07	4.99498e+07	6.31007e+07	4.41232e+07	6.08735e+07	5.6203e+07	4.49405e+07	5.86703e+07	4.44665e+07
TG(16:0_16:0_18:3)+NH4	TG(50:3)+NH4	TG	(16:0_16:0_18:3)	(16:0)	(16:0)	(18:3)	846.755	C53 H100 O6 N1	2.79614e+07	3.18711e+07	2.7435e+07	4.2956e+07	3.11287e+07	3.56755e+07	3.93623e+07	3.37126e+07	2.45466e+07	2.85609e+07	2.2973e+07	1.99495e+07	2.07523e+07	9.61903e+07	4.73179e+07	4.1957e+07	3.03451e+07	3.25609e+07	2.91623e+07	3.02414e+07	2.91238e+07	3.33276e+07	2.71191e+07
TG(14:0_18:3_18:3)+NH4	TG(50:6)+NH4	TG	(14:0_18:3_18:3)	(14:0)	(18:3)	(18:3)	840.708	C53 H94 O6 N1	3.79114e+06	6.27818e+06	4.89486e+06	4.89951e+06	1.55447e+06	3.49184e+06	5.13756e+06	2.58031e+06	2.96441e+06	2.79334e+06	0	0	0	0	2.43205e+07	2.30166e+07	1.19262e+07	3.87503e+06	4.44776e+06	5.97078e+06	9.19358e+06	1.06384e+07	8.90716e+06
TG(16:0_18:1_18:1)+NH4	TG(52:2)+NH4	TG	(16:0_18:1_18:1)	(16:0)	(18:1)	(18:1)	876.801	C55 H106 O6 N1	5.35633e+07	5.14415e+07	4.48601e+07	5.92601e+07	5.38968e+07	8.44858e+07	7.32412e+07	8.74215e+07	4.70541e+07	4.9616e+07	7.46354e+07	3.38686e+07	4.17985e+07	1.25782e+09	4.44925e+07	4.81525e+07	8.36577e+07	6.14741e+07	6.30135e+07	6.35834e+07	4.36223e+07	6.05748e+07	4.89145e+07
TG(16:0_18:1_18:2)+NH4	TG(52:3)+NH4	TG	(16:0_18:1_18:2)	(16:0)	(18:1)	(18:2)	874.786	C55 H104 O6 N1	4.35343e+07	4.13274e+07	4.04706e+07	4.67987e+07	3.87802e+07	6.27488e+07	5.42962e+07	5.73474e+07	4.35337e+07	4.41232e+07	5.14609e+07	3.34312e+07	3.85496e+07	5.15717e+08	4.41232e+07	4.52259e+07	6.14259e+07	4.74349e+07	5.76541e+07	4.73273e+07	3.8949e+07	4.31545e+07	4.27249e+07
TG(16:0_18:3_18:3)+NH4	TG(52:6)+NH4	TG	(16:0_18:3_18:3)	(16:0)	(18:3)	(18:3)	868.739	C55 H98 O6 N1	9.78368e+07	1.0192e+08	9.61455e+07	1.05141e+08	1.01465e+08	1.62921e+08	1.55803e+08	1.2771e+08	1.15046e+08	1.22279e+08	1.02226e+08	6.17201e+07	5.73001e+07	0	1.49561e+08	1.53671e+08	1.20246e+08	8.63593e+07	9.97537e+07	1.00862e+08	9.58793e+07	1.08067e+08	8.15695e+07
TG(16:0_18:3_18:3)+Na	TG(52:6)+Na	TG	(16:0_18:3_18:3)	(16:0)	(18:3)	(18:3)	873.694	C55 H94 O6 Na1	1.25397e+07	1.2536e+07	1.30344e+07	1.33695e+07	1.61245e+07	2.42413e+07	2.30634e+07	1.96683e+07	1.80227e+07	1.4945e+07	1.12483e+07	8.39864e+06	6.31962e+06	0	1.92421e+07	2.00795e+07	1.72788e+07	8.19802e+06	1.235e+07	1.61493e+07	1.36562e+07	1.11808e+07	1.0691e+07
TG(53:4e)+NH4	TG(53:4e)+NH4	TG	(53:4e)	(53:4e)			872.807	C56 H106 O5 N1	5.05756e+07	3.58817e+07	3.02012e+07	8.71459e+07	4.58334e+07	4.84043e+07	4.97375e+07	6.519e+07	4.89426e+07	3.71705e+07	8.90064e+07	3.18274e+07	4.05264e+07	1.86296e+09	4.46589e+07	3.41555e+07	7.78717e+07	6.40149e+07	6.21213e+07	6.81121e+07	4.43559e+07	4.64134e+07	4.70279e+07
TG(53:5e)+NH4	TG(53:5e)+NH4	TG	(53:5e)	(53:5e)			870.791	C56 H104 O5 N1	4.99189e+07	4.73043e+07	4.06865e+07	9.69439e+07	4.24522e+07	4.34409e+07	4.72012e+07	5.75813e+07	3.73086e+07	3.87181e+07	7.28665e+07	2.86516e+07	3.88166e+07	1.93918e+09	3.6619e+07	4.60224e+07	8.27995e+07	5.97567e+07	5.91544e+07	6.57071e+07	4.41232e+07	5.4299e+07	4.66703e+07
TG(18:1_18:1_18:1)+NH4	TG(54:3)+NH4	TG	(18:1_18:1_18:1)	(18:1)	(18:1)	(18:1)	902.817	C57 H108 O6 N1	2.78501e+07	3.17187e+07	2.78341e+07	4.71691e+07	3.25172e+07	4.41232e+07	3.49553e+07	4.37197e+07	2.56787e+07	3.06038e+07	4.41232e+07	2.37397e+07	2.40644e+07	5.54619e+08	2.7735e+07	3.23398e+07	4.07373e+07	4.11404e+07	3.97892e+07	4.24437e+07	3.23013e+07	3.56465e+07	2.55555e+07
TG(18:1_18:1_18:2)+NH4	TG(54:4)+NH4	TG	(18:1_18:1_18:2)	(18:1)	(18:1)	(18:2)	900.801	C57 H106 O6 N1	3.25076e+07	2.7954e+07	2.61896e+07	3.35531e+07	2.95392e+07	3.59392e+07	3.60173e+07	3.7487e+07	2.66526e+07	3.11797e+07	4.16836e+07	2.46701e+07	3.13371e+07	4.28716e+08	2.88654e+07	3.10968e+07	2.95864e+07	4.29437e+07	4.21908e+07	4.13176e+07	3.17094e+07	4.0149e+07	3.23724e+07
TG(18:2_18:2_18:2)+NH4	TG(54:6)+NH4	TG	(18:2_18:2_18:2)	(18:2)	(18:2)	(18:2)	896.77	C57 H102 O6 N1	4.1226e+07	5.52285e+07	4.4831e+07	4.62646e+07	4.89056e+07	5.42314e+07	5.60198e+07	4.48827e+07	5.86002e+07	3.95816e+07	5.91905e+07	4.09379e+07	3.76474e+07	4.0597e+08	5.49732e+07	6.40298e+07	5.47582e+07	5.17791e+07	4.19328e+07	4.44451e+07	4.73752e+07	5.88102e+07	4.78179e+07
TG(55:5e)+NH4	TG(55:5e)+NH4	TG	(55:5e)	(55:5e)			898.822	C58 H108 O5 N1	9.87064e+06	1.46358e+07	1.08614e+07	1.24664e+08	1.88701e+07	1.44746e+07	8.29107e+06	2.28496e+07	1.06917e+07	1.53119e+07	2.55851e+07	9.85165e+06	8.64682e+06	5.49368e+08	1.69924e+07	1.10712e+07	3.18475e+07	2.09675e+07	1.77539e+07	1.63952e+07	1.65143e+07	1.6267e+07	1.0402e+07
TG(55:6e)+NH4	TG(55:6e)+NH4	TG	(55:6e)	(55:6e)			896.807	C58 H106 O5 N1	8.99185e+07	8.6689e+07	7.59446e+07	1.6672e+08	8.89975e+07	8.08559e+07	7.86618e+07	1.50052e+08	8.17163e+07	7.89857e+07	1.65268e+08	6.54585e+07	8.36932e+07	3.46507e+09	6.85473e+07	7.85728e+07	1.77862e+08	1.17731e+08	1.25627e+08	1.19268e+08	8.94838e+07	1.08965e+08	9.48583e+07
WE(2:0_19:4)+NH4	WE(21:4)+NH4	WE	(2:0_19:4)	(2:0)	(19:4)		336.29	H38 C21 O2 N1	1.3165e+08	1.1938e+08	1.21486e+08	511250	1.36259e+08	449850	145050	473604	204986	442316	651638	331570	185506	1.16017e+07	357023	691030	1.0472e+06	1.08694e+09	1.22547e+09	1.2187e+09	462010	950784	189849
