# Supplementary material for: Lipids associated with plant-bacteria interaction identified using a metabolomics approach in an Arabidopsis thaliana model
Source: PeerJ journal article supplement (doi:10.7717/peerj.13293), 2022-04-27

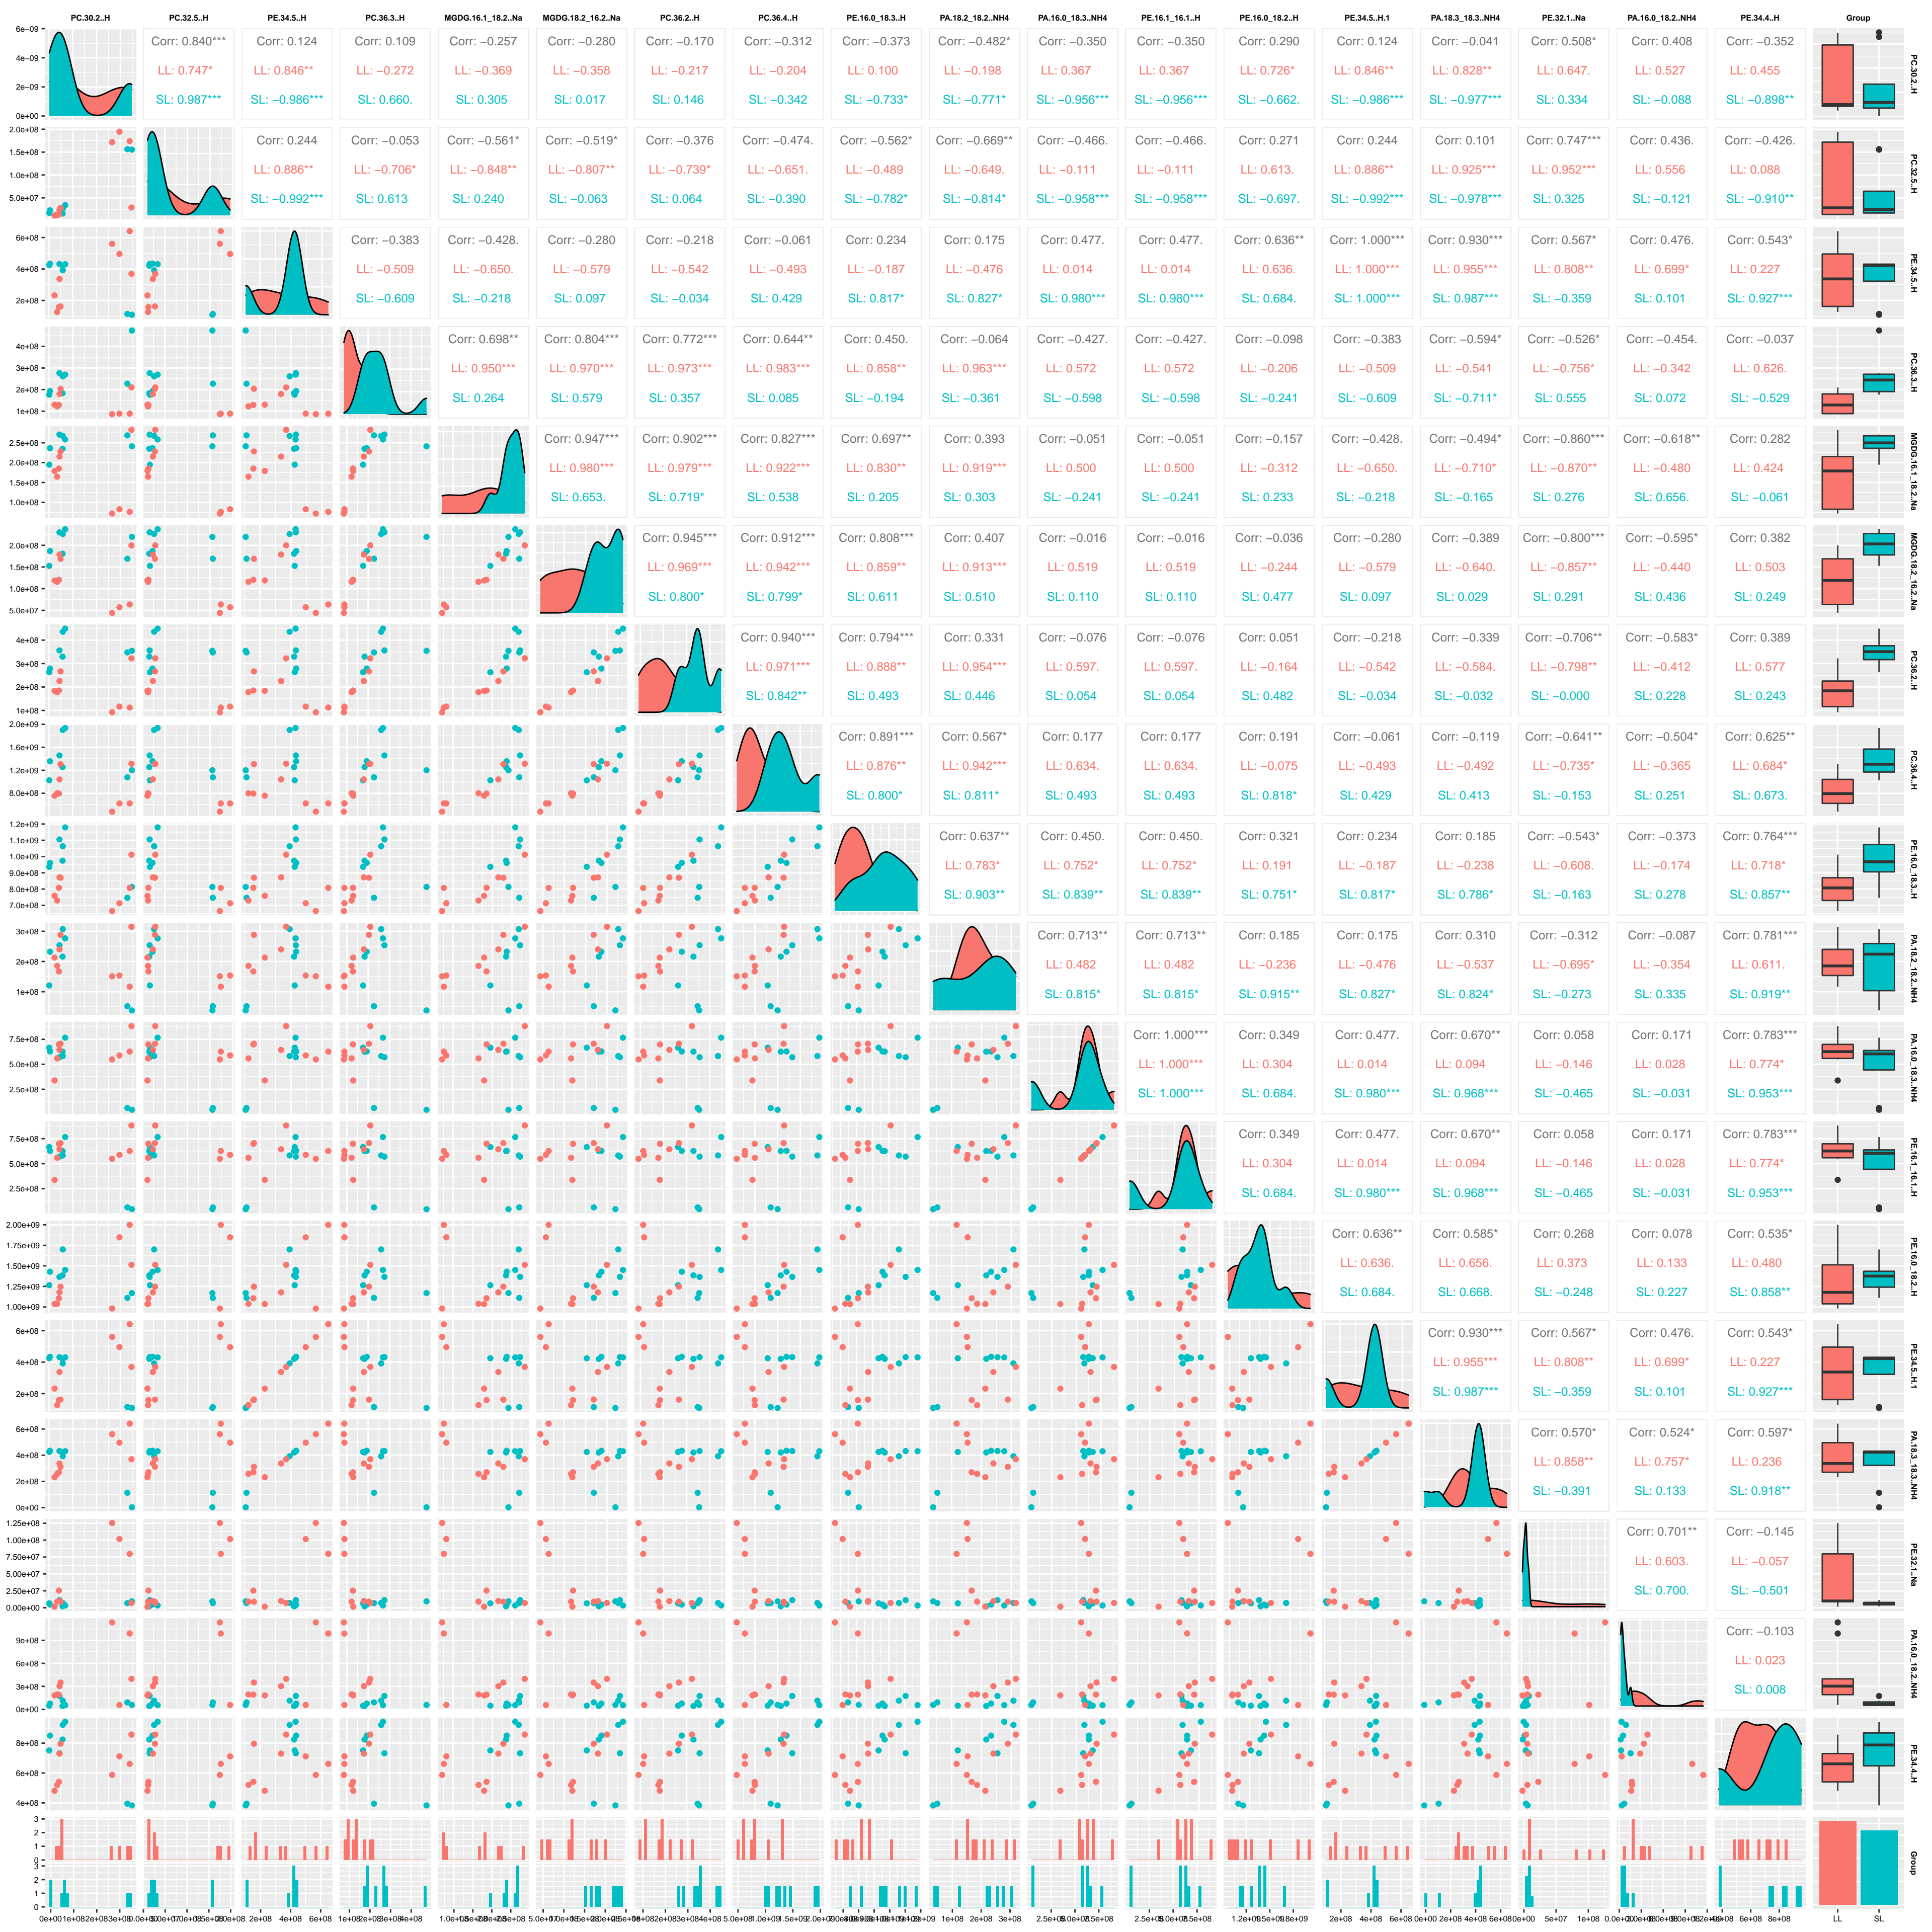

Supplement: supplementary_file2.pdf [file supplementary_file2.pdf]
